# Supplementary material
Source: Springer Nature journal article supplement (https://www.springermedizin.de/resource/supplementary/12885_2008_1368_MOESM6_ESM.pdf/9472618)
Supplement: MOESM6 [file 9472618]

a: Interferon- $\alpha$   
b: Sunitinib  
c: Bevacizumab  
d: Sorafenib  
e: Placebo

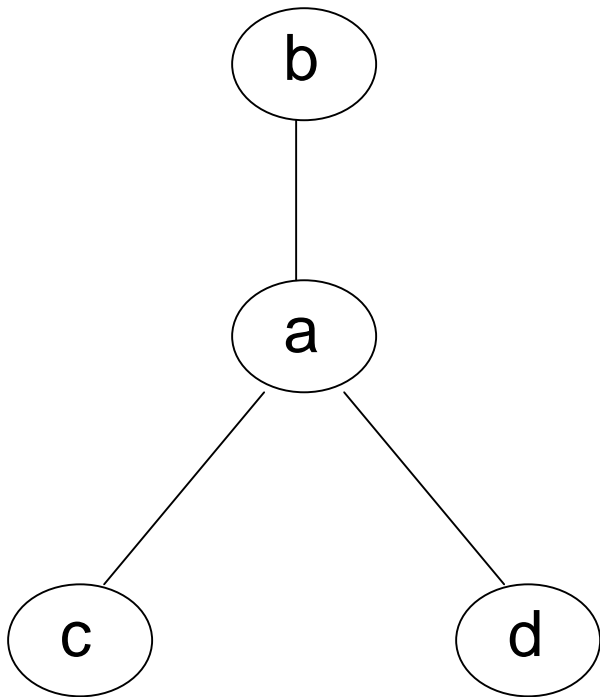

1) Indirect comparison with interferon- $\alpha$  as common comparison

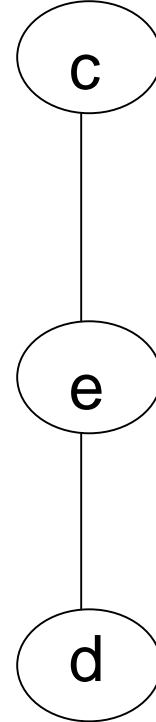

2) Indirect comparison with placebo as common comparison
